# Supplementary material
Source: PubMed Central journal article supplement (PMC10803798)
Supplement: 41416_2023_2493_MOESM1_ESM.pdf [file 41416_2023_2493_MOESM1_ESM.pdf]

**Supplementary Table S1. The proportion of patients with nausea, vomiting, or rescue**

|                                     |         | Arm D4 (n = 138) | Arm D1 (n = 136) | P-value |
|-------------------------------------|---------|------------------|------------------|---------|
| Nausea (NRS>1), n (%)               | Acute   | 14 (10.1)        | 16 (11.8)        | 0.67    |
|                                     | Delayed | 49 (35.5)        | 65 (47.8)        | 0.039   |
|                                     | Overall | 52 (37.7)        | 68 (50.0)        | 0.040   |
| Severe nausea (NRS $\geq$ 3), n (%) | Acute   | 7 (5.1)          | 5 (3.7)          | 0.57    |
|                                     | Delayed | 28 (20.3)        | 35 (25.7)        | 0.28    |
|                                     | Overall | 30 (21.7)        | 37 (27.2)        | 0.29    |
| Vomiting, n (%)                     | Acute   | 1 (0.7)          | 1 (0.7)          | 0.99    |
|                                     | Delayed | 7 (5.1)          | 7 (5.1)          | 0.98    |
|                                     | Overall | 7 (5.1)          | 8 (5.9)          | 0.77    |
| Rescue medications, n (%)           | Acute   | 4 (2.9)          | 3 (2.2)          | 0.72    |
|                                     | Delayed | 25 (18.1)        | 31 (22.8)        | 0.34    |
|                                     | Overall | 26 (18.8)        | 34 (25.0)        | 0.22    |

Abbreviations: Arm D4, dexamethasone day 1 to 4; Arm D1, dexamethasone day 1.

**Supplementary Table S2. Use of rescue medication**

|                                        |        | <b>Arm D4 (n = 138)</b> | <b>Arm D1 (n = 136)</b> | <b>P-value</b> |
|----------------------------------------|--------|-------------------------|-------------------------|----------------|
| Overall, n (%)                         |        | 26 (18.8)               | 34 (25.0)               | 0.22           |
| Time from CDDP administration (hours), | 0-24   | 4 (2.9)                 | 3 (2.2)                 | 0.72           |
| n (%)                                  | 24-48  | 4 (2.9)                 | 5 (3.7)                 | 0.72           |
|                                        | 48-72  | 11 (8.0)                | 16 (11.8)               | 0.29           |
|                                        | 72-96  | 14 (10.1)               | 18 (13.2)               | 0.43           |
|                                        | 96-120 | 20 (14.5)               | 14 (10.3)               | 0.29           |

Abbreviations: Arm D4, dexamethasone day 1 to 4; Arm D1, dexamethasone day 1; CDDP, cisplatin.

**Supplementary Table S3. Adverse events according to the investigator's evaluation**

| Symptom                  | Arm D4 (n = 139) |                |                |                |                  |                 | Arm D1 (n = 136) |                |                |                |                  |                 | P-value |
|--------------------------|------------------|----------------|----------------|----------------|------------------|-----------------|------------------|----------------|----------------|----------------|------------------|-----------------|---------|
|                          | Grade 1, n (%)   | Grade 2, n (%) | Grade 3, n (%) | Grade 4, n (%) | Any Grade, n (%) | ≥Grade 3, n (%) | Grade 1, n (%)   | Grade 2, n (%) | Grade 3, n (%) | Grade 4, n (%) | Any Grade, n (%) | ≥Grade 3, n (%) |         |
| Nausea                   | 34 (24.5)        | 23 (16.5)      | 2 (1.4)        | 0 (0.0)        | 59 (42.4)        | 2 (1.4)         | 35 (25.7)        | 38 (27.9)      | 1 (0.7)        | 0 (0.0)        | 74 (54.4)        | 1 (0.7)         | 0.031   |
| Vomiting                 | 5 (3.6)          | 2 (1.4)        | 0 (0.0)        | 0 (0.0)        | 7 (5.0)          | 0 (0.0)         | 7 (5.1)          | 1 (0.7)        | 0 (0.0)        | 0 (0.0)        | 8 (5.9)          | 0 (0.0)         | 0.97    |
| Dry mouth                | 53 (38.1)        | 5 (3.6)        | 0 (0.0)        | 0 (0.0)        | 58 (41.7)        | 0 (0.0)         | 55 (40.4)        | 4 (2.9)        | 0 (0.0)        | 0 (0.0)        | 59 (43.4)        | 0 (0.0)         | 0.88    |
| Mucositis oral           | 7 (5.0)          | 2 (1.4)        | 0 (0.0)        | 0 (0.0)        | 9 (6.5)          | 0 (0.0)         | 12 (8.8)         | 0 (0.0)        | 0 (0.0)        | 0 (0.0)        | 12 (8.8)         | 0 (0.0)         | 0.80    |
| Constipation             | 46 (33.1)        | 51 (36.7)      | 2 (1.4)        | 0 (0.0)        | 99 (71.2)        | 2 (1.4)         | 66 (48.5)        | 30 (22.1)      | 2 (1.5)        | 0 (0.0)        | 98 (72.1)        | 2 (1.5)         | 0.15    |
| Diarrhea                 | 15 (0.8)         | 6 (4.3)        | 0 (0.0)        | 0 (0.0)        | 21 (15.1)        | 0 (0.0)         | 23 (16.9)        | 2 (1.5)        | 2 (1.5)        | 0 (0.0)        | 27 (19.9)        | 2 (1.5)         | 0.44    |
| Bloating                 | 28 (20.1)        | 5 (3.6)        | 0 (0.0)        | 0 (0.0)        | 33 (23.7)        | 0 (0.0)         | 27 (19.9)        | 7 (5.1)        | 0 (0.0)        | 0 (0.0)        | 34 (25.0)        | 0 (0.0)         | 0.67    |
| Anorexia                 | 38 (27.3)        | 33 (23.7)      | 6 (4.3)        | 0 (0.0)        | 77 (55.4)        | 6 (4.3)         | 60 (44.1)        | 43 (31.6)      | 4 (2.9)        | 0 (0.0)        | 107 (78.7)       | 4 (2.9)         | 0.0067  |
| Depression               | 7 (5.0)          | 1 (0.7)        | 0 (0.0)        | 0 (0.0)        | 8 (5.8)          | 0 (0.0)         | 7 (5.1)          | 0 (0.0)        | 0 (0.0)        | 0 (0.0)        | 7 (5.1)          | 0 (0.0)         | 0.66    |
| Anxiety                  | 23 (6.5)         | 1 (0.7)        | 0 (0.0)        | 0 (0.0)        | 24 (17.3)        | 0 (0.0)         | 19 (14.0)        | 0 (0.0)        | 0 (0.0)        | 0 (0.0)        | 19 (14.0)        | 0 (0.0)         | 0.38    |
| Insomnia                 | 28 (20.1)        | 4 (2.9)        | 0 (0.0)        | 0 (0.0)        | 32 (23.0)        | 0 (0.0)         | 24 (17.6)        | 3 (2.2)        | 0 (0.0)        | 0 (0.0)        | 27 (19.9)        | 0 (0.0)         | 0.51    |
| Hot flushes              | 23 (16.5)        | 1 (0.7)        | 0 (0.0)        | 0 (0.0)        | 24 (17.3)        | 0 (0.0)         | 33 (24.3)        | 0 (0.0)        | 0 (0.0)        | 0 (0.0)        | 33 (24.3)        | 0 (0.0)         | 0.21    |
| Hiccups                  | 57 (41.0)        | 17 (12.2)      | 2 (1.4)        | 0 (0.0)        | 76 (54.7)        | 2 (1.4)         | 66 (48.5)        | 18 (13.2)      | 0 (0.0)        | 0 (0.0)        | 84 (61.8)        | 0 (0.0)         | 0.54    |
| Somnolence               | 58 (41.7)        | 3 (2.2)        | 0 (0.0)        | 0 (0.0)        | 61 (43.9)        | 0 (0.0)         | 53 (39.0)        | 9 (6.6)        | 0 (0.0)        | 0 (0.0)        | 62 (45.6)        | 0 (0.0)         | 0.38    |
| Dysgeusia                | 15 (10.8)        | 8 (5.8)        | 0 (0.0)        | 0 (0.0)        | 23 (16.5)        | 0 (0.0)         | 19 (14.0)        | 7 (5.1)        | 0 (0.0)        | 0 (0.0)        | 26 (19.1)        | 0 (0.0)         | 0.76    |
| Headache                 | 16 (11.5)        | 0 (0.0)        | 0 (0.0)        | 0 (0.0)        | 16 (11.5)        | 0 (0.0)         | 27 (19.9)        | 0 (0.0)        | 0 (0.0)        | 0 (0.0)        | 27 (19.9)        | 0 (0.0)         | 0.057   |
| Olfactory nerve disorder | 3 (2.2)          | 0 (0.0)        | 0 (0.0)        | 0 (0.0)        | 3 (2.2)          | 0 (0.0)         | 4 (2.9)          | 0 (0.0)        | 0 (0.0)        | 0 (0.0)        | 4 (2.9)          | 0 (0.0)         | 0.68    |
| Fatigue                  | 51 (36.7)        | 12 (8.6)       | 1 (0.7)        | 0 (0.0)        | 64 (46.0)        | 1 (0.7)         | 49 (36.0)        | 13 (9.6)       | 0 (0.0)        | 0 (0.0)        | 62 (45.6)        | 0 (0.0)         | 0.91    |
| Fall                     | 3 (2.2)          | 2 (1.4)        | 0 (0.0)        | 0 (0.0)        | 5 (3.6)          | 0 (0.0)         | 2 (1.5)          | 0 (0.0)        | 0 (0.0)        | 0 (0.0)        | 2 (1.5)          | 0 (0.0)         | 0.17    |

Abbreviations: Arm D4, dexamethasone day 1 to 4; Arm D1, dexamethasone day1.

**Supplementary Table S4. Quality of Life Analyses**

| Variable             | Arm D4 (n = 139)  |                            | Arm D1 (n = 136)  |                            |
|----------------------|-------------------|----------------------------|-------------------|----------------------------|
|                      | Screening Phase,  | End of the Overall Period, | Screening Phase,  | End of the Overall Period, |
|                      | Mean [95%CI]      | Mean [95%CI]               | Mean [95%CI]      | Mean [95%CI]               |
| Global health status | 59.1 [55.0, 63.1] | 49.3 [44.9, 53.7]          | 63.4 [59.1, 67.6] | 51.4 [47.5, 55.3]          |
| Functional scales    |                   |                            |                   |                            |
| Physical             | 88.7 [86.8, 90.7] | 80.7 [77.5, 84.0]          | 89.2 [86.7, 91.8] | 85.9 [83.2, 88.7]          |
| Role                 | 84.3 [80.8, 87.9] | 64.2 [58.8, 69.7]          | 87.6 [84.4, 90.8] | 71.6 [66.4, 76.9]          |
| Emotional            | 77.2 [74.9, 79.6] | 82.5 [79.9, 85.1]          | 78.8 [75.8, 81.8] | 85.3 [82.6, 88.0]          |
| Cognitive            | 85.5 [83.1, 87.9] | 80.9 [77.8, 84.0]          | 86.6 [83.9, 89.4] | 85.8 [83.2, 88.3]          |
| Social               | 78.3 [74.8, 81.7] | 72.1 [67.8, 76.5]          | 75.6 [71.4, 79.9] | 72.8 [67.7, 77.9]          |
| Symptom scales       |                   |                            |                   |                            |
| Fatigue              | 25.9 [22.7, 29.1] | 37.2 [33.1, 41.4]          | 24.4 [21.2, 27.7] | 31.8 [28.3, 35.4]          |
| Nausea and vomiting  | 3.3 [1.8, 4.8]    | 12.8 [9.6, 15.9]           | 2.3 [1.1, 3.6]    | 12.1 [9.4, 14.8]           |
| Pain                 | 20.3 [16.5, 24.1] | 21.7 [17.6, 25.7]          | 17.0 [13.9, 20.2] | 14.2 [10.9, 17.6]          |
| Dyspnea              | 18.4 [14.6, 22.1] | 19.7 [15.6, 23.8]          | 15.9 [12.2, 19.7] | 16.0 [12.4, 19.7]          |
| Insomnia             | 22.9 [19.0, 27.0] | 28.5 [23.8, 33.2]          | 18.4 [14.4, 22.4] | 21.6 [17.7, 25.5]          |
| Appetite loss        | 20.3 [16.6, 24.0] | 41.1 [35.5, 46.8]          | 14.0 [10.3, 17.7] | 45.4 [39.7, 51.1]          |
| Constipation         | 17.4 [13.8, 21.0] | 42.1 [36.8, 47.4]          | 14.7 [11.2, 18.2] | 31.8 [27.1, 36.5]          |
| Diarrhea             | 10.1 [7.2, 13.1]  | 19.1 [15.0, 23.3]          | 9.1 [6.2, 11.9]   | 21.9 [17.1, 26.7]          |

Abbreviations: CI, confidential interval; Arm D4, dexamethasone days 1–4; Arm D1, dexamethasone day 1.

**Supplementary Figure S1. Variation of NRS scores for nausea from baseline**

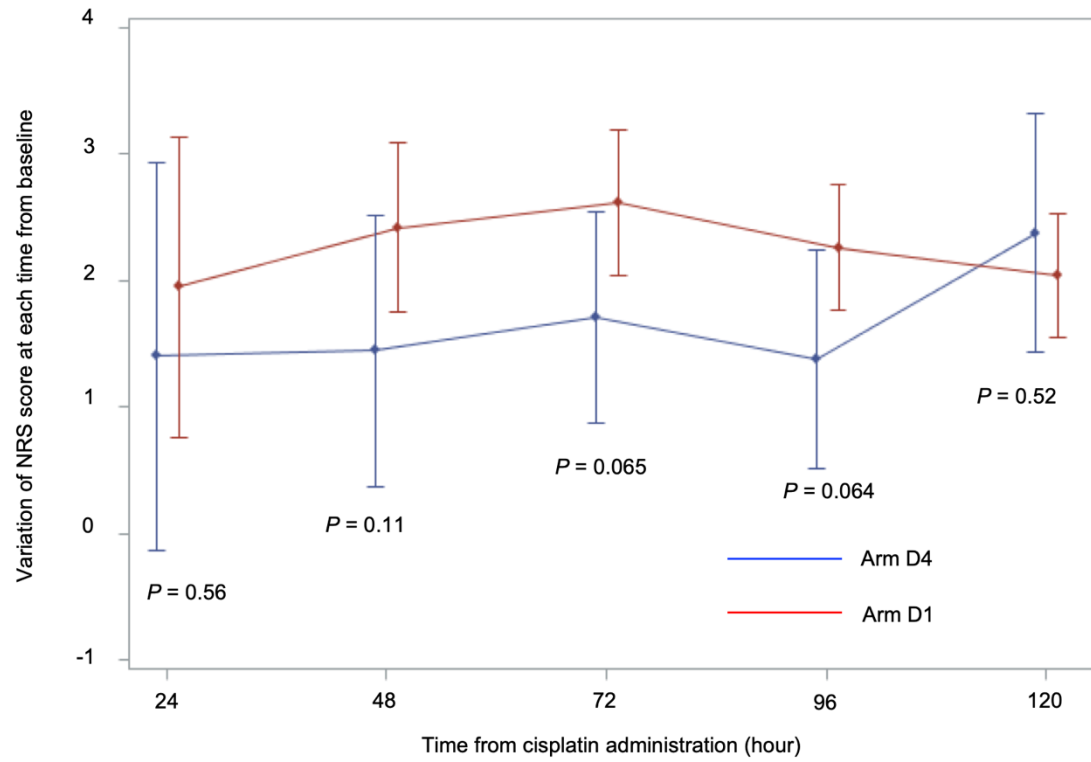

The NRS nausea scores were analyzed every 24 hours from the start of cisplatin administration to 120 hours.

Arm D4, dexamethasone days 1–4; Arm D1, dexamethasone day 1; NRS, numerical rating scale.

**Supplementary Figure S2. Forest plot of independent prognostic factor subgroup analyses for CR rate**

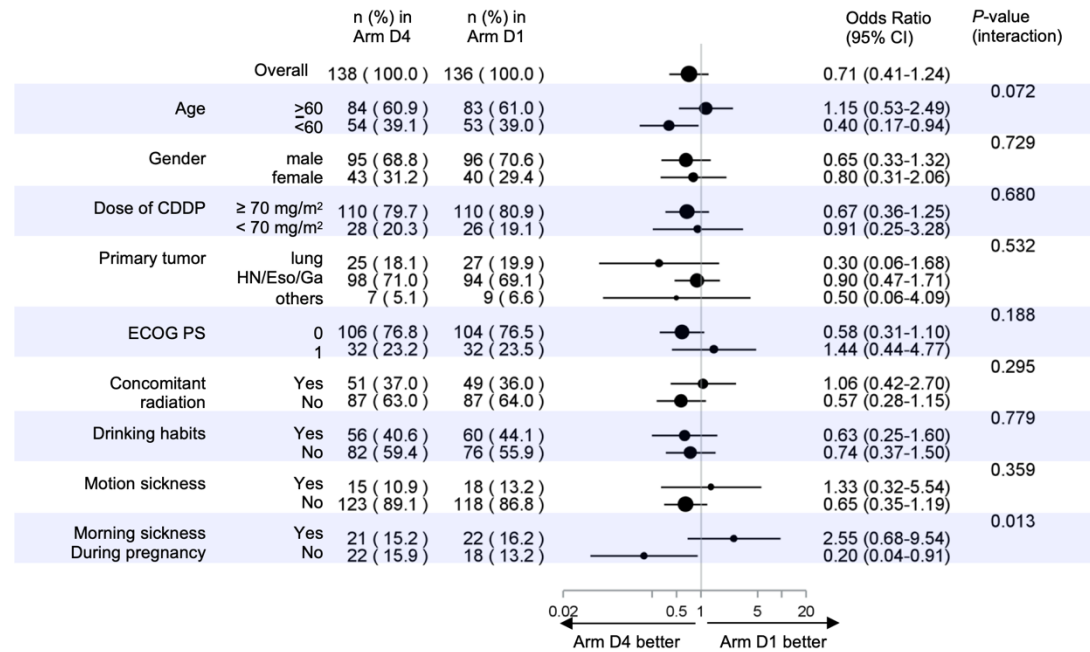

Arm D4, dexamethasone days 1–4; Arm D1, dexamethasone day 1; CDDP, cisplatin; CR, complete response; ECOG, Eastern Cooperative Oncology Group; PS, performance status.

Supplementary Figure S3. Forest plot of independent prognostic factor subgroup analyses for CC rate

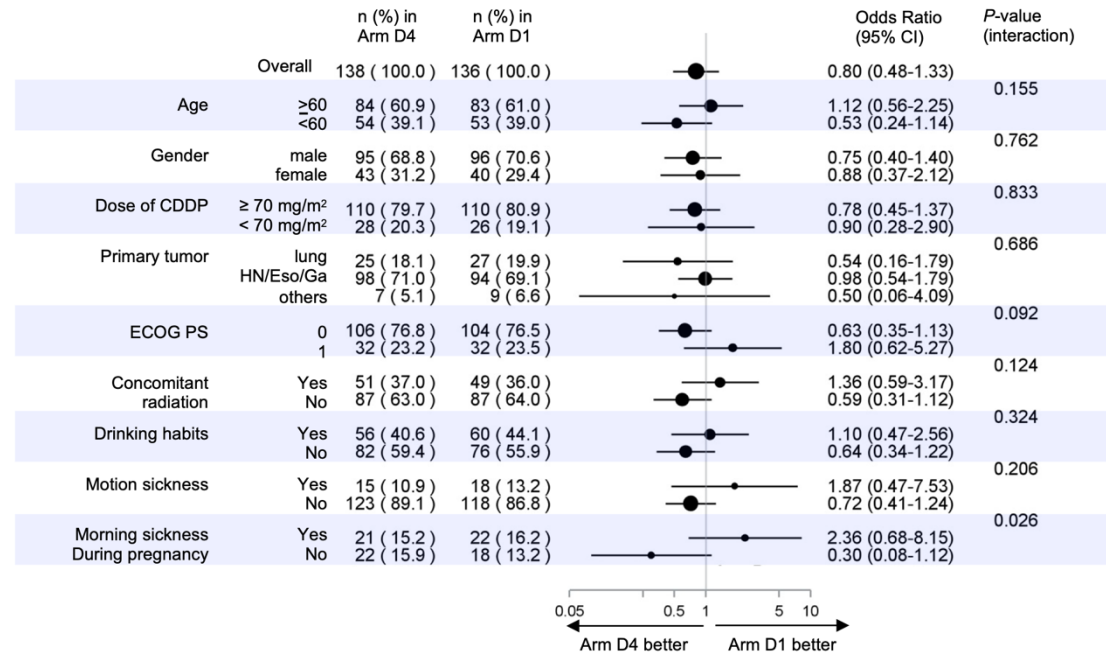

Arm D4, dexamethasone days 1–4; Arm D1, dexamethasone day 1; CDDP, cisplatin; CC, complete control; ECOG, Eastern Cooperative Oncology Group; PS, performance status.

Supplementary Figure S4. Forest plot of independent prognostic factor subgroup analyses for TC rate

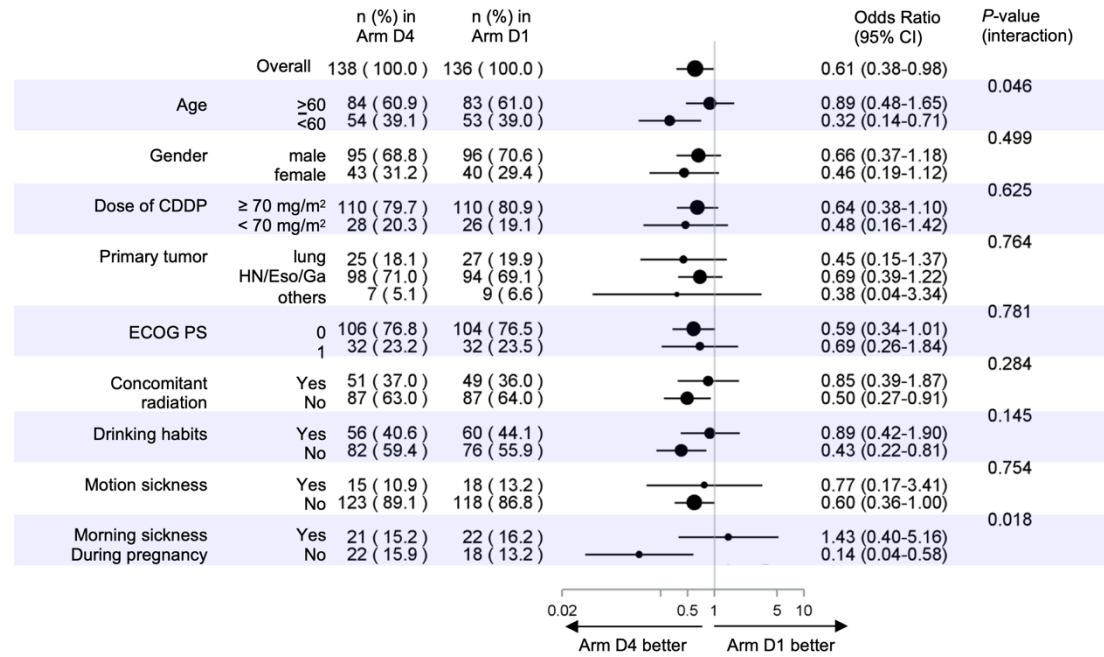

Arm D4, dexamethasone days 1–4; Arm D1, dexamethasone day 1; CDDP, cisplatin; ECOG, Eastern Cooperative Oncology Group; TC, total control; PS, performance status.



**Supplementary Figure S5. Forest plot of independent prognostic factor subgroup analyses for the incidence of no nausea**

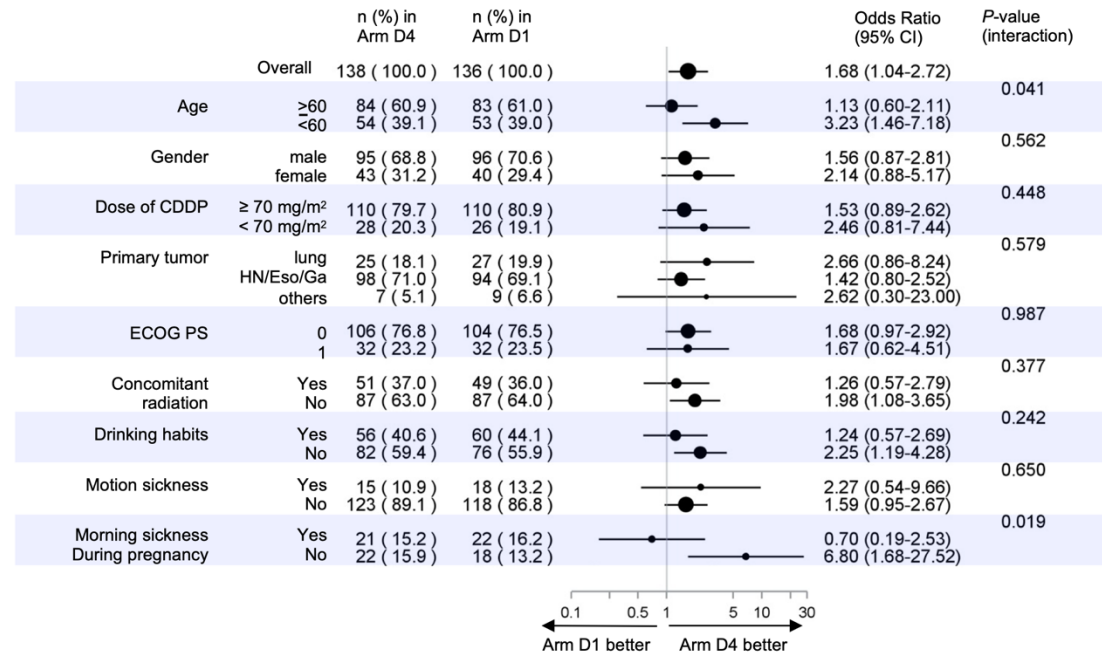

Arm D4, dexamethasone days 1–4; Arm D1, dexamethasone day 1; CDDP, cisplatin; CR, complete response; ECOG, Eastern Cooperative Oncology Group; PS, performance status.

**Supplementary Figure S6. Kaplan–Meier plot showing time to antiemetic treatment failure**

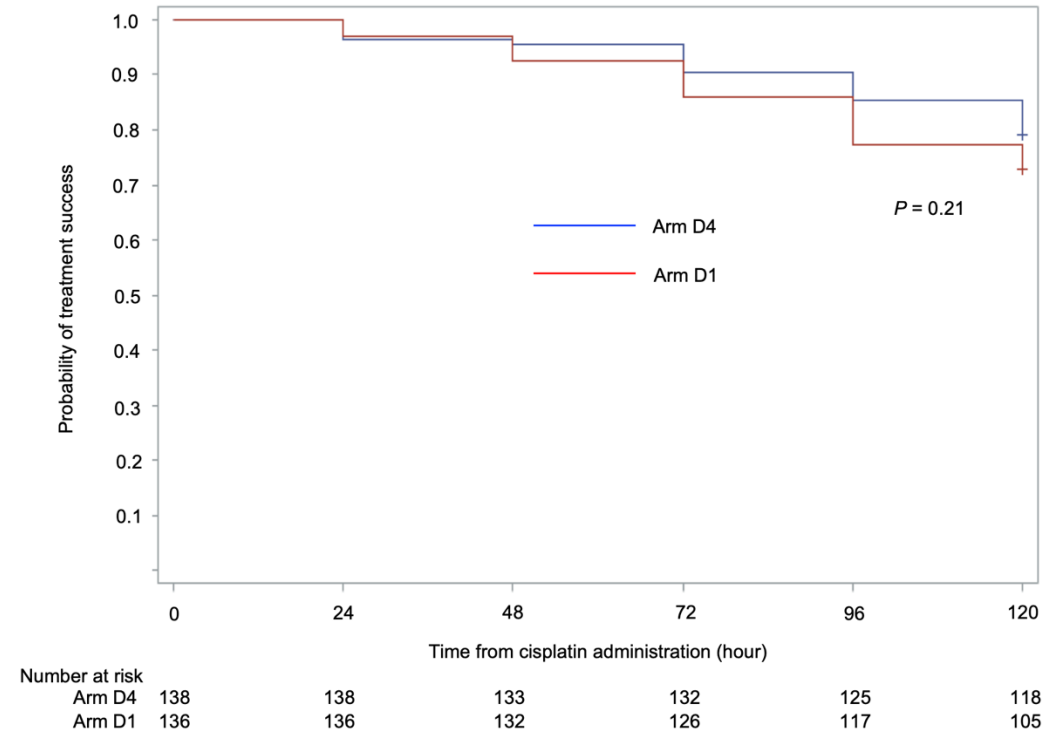

Arm D4, dexamethasone days 1–4; Arm D1, dexamethasone day 1.
